# Supplementary material for: Quasispecies Analysis of SARS-CoV-2 of 15 Different Lineages during the First Year of the Pandemic Prompts Scratching under the Surface of Consensus Genome Sequences
Source: MDPI journal article supplement (doi:10.3390/ijms232415658), 2022-12-10
Supplement: s1 [file s1]

*Supplementary Materials for:*  
**Quasispecies Analysis of SARS-CoV-2 of 15 Different  
Lineages during the First Year of the Pandemic  
Prompts Scratching under the Surface of Consensus  
Genome Sequences**

Wahiba Bader <sup>1,2</sup>, Jeremy Delerce <sup>1</sup>, Sarah Aherfi <sup>1,2,3</sup>, Bernard La Scola <sup>1,2,3</sup> and Philippe Colson <sup>1,2,3,\*</sup>

<sup>1</sup> IHU Méditerranée Infection, 19–21 Boulevard Jean Moulin, 13005 Marseille, France; wahibabader.com@gmail.com (W.B.); jeremy.delerce@univ-amu.fr (J.D.); sarah.aherfi@ap-hm.fr (S.A.); bernard.la-scola@univ-amu.fr (B.L.S.)

<sup>2</sup> Microbes Evolution Phylogeny and Infections (MEPHI), Institut de Recherche pour le Développement (IRD), Aix-Marseille University, 27 Boulevard Jean Moulin, 13005 Marseille, France

<sup>3</sup> Assistance Publique-Hôpitaux de Marseille (AP-HM), 264 rue Saint-Pierre, 13005 Marseille, France

\* Correspondence: philippe.colson@univ-amu.fr; Tel.: +33-413-732-024

**Supplementary Table S1.** Number and classification of the genomes analyzed in the present study, and their sequencing depth

| SARS-CoV-2 lineage                                     | 20A | 20B | 20C | Marseille-1 | Marseille-2 | Marseille-3 | Marseille-4 | Marseille-5 | Marseille-6 | Marseille-7 | Marseille-8 | Marseille-9 | Marseille-10 | Alpha | Beta | Total |
|--------------------------------------------------------|-----|-----|-----|-------------|-------------|-------------|-------------|-------------|-------------|-------------|-------------|-------------|--------------|-------|------|-------|
| Total number of respiratory samples                    | 36  | 13  | 15  | 18          | 36          | 18          | 66          | 41          | 8           | 7           | 15          | 10          | 9            | 17    | 1    | 310   |
| Number of selected respiratory samples                 | 22  | 9   | 6   | 4           | 11          | 5           | 16          | 9           | 3           | 4           | 5           | 4           | 5            | 6     | 1    | 110   |
| Mean next-generation sequencing depth                  | 332 | 106 | 242 | 121         | 240         | 168         | 165         | 140         | 72          | 99          | 223         | 83          | 266          | 205   | 76   | 169   |
| Standard deviation of next-generation sequencing depth | 110 | 46  | 80  | 62          | 188         | 94          | 81          | 74          | 31          | 39          | 114         | 38          | 244          | 92    | 26   | 88    |
| Minimum next-generation sequencing depth               | 17  | 10  | 11  | 20          | 34          | 13          | 13          | 12          | 6           | 12          | 22          | 7           | 34           | 30    | 10   | 17    |
| Maximum next-generation sequencing depth               | 729 | 353 | 505 | 397         | 1193        | 654         | 560         | 497         | 225         | 260         | 782         | 267         | 1502         | 603   | 171  | 580   |

**Supplementary Table S2.** GenBank Accession numbers and IHU Méditerranée Infection identifiers of the genomes analyzed in the present study, and collection dates and genotypes

| GenBank_ID | Sequence_ID     | Collection date | Genotype    |
|------------|-----------------|-----------------|-------------|
| OP646492   | IHUCOVID-000133 | 13-Mar-20       | 20A         |
| OP646493   | IHUCOVID-000662 | 16-Mar-20       | 20C         |
| OP646494   | IHUCOVID-000141 | 19-Mar-20       | 20B         |
| OP646495   | IHUCOVID-000087 | 20-Mar-20       | 20B         |
| OP646496   | IHUCOVID-000651 | 20-Mar-20       | 20C         |
| OP646497   | IHUCOVID-000094 | 22-Mar-20       | 20C         |
| OP646498   | IHUCOVID-000168 | 25-Mar-20       | 20B         |
| OP646499   | IHUCOVID-000178 | 26-Mar-20       | 20A         |
| OP646500   | IHUCOVID-000213 | 28-Mar-20       | 20A         |
| OP646501   | IHUCOVID-000215 | 28-Mar-20       | 20A         |
| OP646502   | IHUCOVID-000210 | 28-Mar-20       | 20B         |
| OP646503   | IHUCOVID-000231 | 29-Mar-20       | 20A         |
| OP646504   | IHUCOVID-000401 | 29-Mar-20       | 20A         |
| OP646505   | IHUCOVID-000227 | 29-Mar-20       | 20C         |
| OP646506   | IHUCOVID-000246 | 30-Mar-20       | 20A         |
| OP646507   | IHUCOVID-000281 | 31-Mar-20       | 20C         |
| OP646508   | IHUCOVID-000507 | 6-Apr-20        | 20A         |
| OP646509   | IHUCOVID-000518 | 6-Apr-20        | 20A         |
| OP646510   | IHUCOVID-000534 | 7-Apr-20        | 20A         |
| OP646511   | IHUCOVID-000560 | 8-Apr-20        | 20A         |
| OP646512   | IHUCOVID-000602 | 10-Apr-20       | 20B         |
| OP646513   | IHUCOVID-000673 | 15-Apr-20       | 20A         |
| OP646514   | IHUCOVID-000674 | 15-Apr-20       | 20A         |
| OP646515   | IHUCOVID-000680 | 15-Apr-20       | 20A         |
| OP646516   | IHUCOVID-000672 | 15-Apr-20       | 20B         |
| OP646517   | IHUCOVID-000675 | 15-Apr-20       | 20B         |
| OP646518   | IHUCOVID-000688 | 16-Apr-20       | 20A         |
| OP646519   | IHUCOVID-000702 | 16-Apr-20       | 20A         |
| OP646520   | IHUCOVID-000726 | 20-Apr-20       | 20C         |
| OP646521   | IHUCOVID-000728 | 21-Apr-20       | 20A         |
| OP646522   | IHUCOVID-000730 | 21-Apr-20       | 20B         |
| OP646523   | IHUCOVID-000731 | 21-Apr-20       | 20B         |
| OP646524   | IHUCOVID-000781 | 27-Apr-20       | 20A         |
| OP646525   | IHUCOVID-000793 | 1-May-20        | 20A         |
| OP646526   | IHUCOVID-000798 | 2-May-20        | 20A         |
| OP646527   | IHUCOVID-000803 | 5-May-20        | 20A         |
| OP646528   | IHUCOVID-000819 | 6-May-20        | 20A         |
| OP646529   | IHUCOVID-000957 | 13-Jul-20       | Marseille-1 |
| OP646530   | IHUCOVID-000976 | 23-Jul-20       | Marseille-1 |
| OP646531   | IHUCOVID-001040 | 31-Jul-20       | Marseille-6 |
| OP646532   | IHUCOVID-001054 | 4-Aug-20        | Marseille-4 |
| OP646533   | IHUCOVID-001092 | 5-Aug-20        | Marseille-4 |
| OP646534   | IHUCOVID-001138 | 7-Aug-20        | Marseille-4 |
| OP646535   | IHUCOVID-000986 | 9-Aug-20        | Marseille-4 |
| OP646536   | IHUCOVID-001502 | 10-Aug-20       | Marseille-3 |
| OP646537   | IHUCOVID-001420 | 10-Aug-20       | Marseille-4 |

Supplementary Table S2 (continued)

| GenBank_ID | Sequence_ID     | Collection date | Genotype     |
|------------|-----------------|-----------------|--------------|
| OP646538   | IHUCOVID-001446 | 10-Aug-20       | Marseille-5  |
| OP646539   | IHUCOVID-001476 | 11-Aug-20       | Marseille-3  |
| OP646540   | IHUCOVID-001488 | 11-Aug-20       | Marseille-4  |
| OP646541   | IHUCOVID-001505 | 12-Aug-20       | Marseille-2  |
| OP646542   | IHUCOVID-001521 | 12-Aug-20       | Marseille-4  |
| OP646543   | IHUCOVID-001519 | 12-Aug-20       | Marseille-4  |
| OP646544   | IHUCOVID-001164 | 13-Aug-20       | Marseille-4  |
| OP646545   | IHUCOVID-001169 | 14-Aug-20       | Marseille-5  |
| OP646546   | IHUCOVID-001175 | 14-Aug-20       | Marseille-6  |
| OP646547   | IHUCOVID-001179 | 15-Aug-20       | Marseille-4  |
| OP646548   | IHUCOVID-001213 | 17-Aug-20       | Marseille-1  |
| OP646549   | IHUCOVID-001215 | 17-Aug-20       | Marseille-1  |
| OP646550   | IHUCOVID-001193 | 17-Aug-20       | Marseille-3  |
| OP646551   | IHUCOVID-001229 | 17-Aug-20       | Marseille-3  |
| OP646552   | IHUCOVID-001191 | 17-Aug-20       | Marseille-4  |
| OP646553   | IHUCOVID-001189 | 17-Aug-20       | Marseille-4  |
| OP646554   | IHUCOVID-001195 | 17-Aug-20       | Marseille-5  |
| OP646555   | IHUCOVID-001206 | 17-Aug-20       | Marseille-5  |
| OP646556   | IHUCOVID-001224 | 17-Aug-20       | Marseille-7  |
| OP646557   | IHUCOVID-001283 | 18-Aug-20       | Marseille-3  |
| OP646558   | IHUCOVID-001292 | 18-Aug-20       | Marseille-5  |
| OP646559   | IHUCOVID-001279 | 18-Aug-20       | Marseille-7  |
| OP646560   | IHUCOVID-001329 | 19-Aug-20       | Marseille-5  |
| OP646561   | IHUCOVID-001341 | 19-Aug-20       | Marseille-5  |
| OP646562   | IHUCOVID-001350 | 19-Aug-20       | Marseille-7  |
| OP646563   | IHUCOVID-001336 | 19-Aug-20       | Marseille-8  |
| OP646564   | IHUCOVID-001342 | 19-Aug-20       | Marseille-2  |
| OP646565   | IHUCOVID-001345 | 19-Aug-20       | Marseille-7  |
| OP646566   | IHUCOVID-001355 | 20-Aug-20       | Marseille-4  |
| OP646567   | IHUCOVID-001897 | 26-Aug-20       | Marseille-2  |
| OP646568   | IHUCOVID-001929 | 27-Aug-20       | Marseille-6  |
| OP646569   | IHUCOVID-001976 | 27-Aug-20       | Marseille-9  |
| OP646570   | IHUCOVID-001572 | 1-Sep-20        | Marseille-5  |
| OP646571   | IHUCOVID-001592 | 1-Sep-20        | Marseille-10 |
| OP646572   | IHUCOVID-001568 | 1-Sep-20        | Marseille-10 |
| OP646573   | IHUCOVID-001625 | 10-Sep-20       | Marseille-2  |
| OP646574   | IHUCOVID-001626 | 10-Sep-20       | Marseille-5  |
| OP646575   | IHUCOVID-001627 | 10-Sep-20       | Marseille-8  |
| OP646576   | IHUCOVID-001622 | 10-Sep-20       | Marseille-10 |
| OP646577   | IHUCOVID-001628 | 11-Sep-20       | Marseille-2  |
| OP646578   | IHUCOVID-001678 | 14-Sep-20       | Marseille-2  |
| OP646579   | IHUCOVID-001672 | 14-Sep-20       | Marseille-2  |
| OP646580   | IHUCOVID-001676 | 14-Sep-20       | Marseille-10 |
| OP646581   | IHUCOVID-001665 | 15-Sep-20       | Marseille-2  |
| OP646582   | IHUCOVID-001756 | 18-Sep-20       | Marseille-2  |
| OP646583   | IHUCOVID-001758 | 19-Sep-20       | Marseille-10 |
| OP646584   | IHUCOVID-002071 | 23-Sep-20       | Marseille-2  |

*Supplementary Table S2 (continued)*

| GenBank_ID | Sequence_ID     | Collection date | Genotype    |
|------------|-----------------|-----------------|-------------|
| OP646585   | IHUCOVID-002103 | 26-Sep-20       | Marseille-8 |
| OP646586   | IHUCOVID-002627 | 9-Oct-20        | Marseille-8 |
| OP646587   | IHUCOVID-002394 | 12-Oct-20       | Marseille-9 |
| OP646588   | IHUCOVID-002401 | 13-Oct-20       | Marseille-2 |
| OP646589   | IHUCOVID-002569 | 20-Oct-20       | Marseille-8 |
| OP646590   | IHUCOVID-002653 | 20-Oct-20       | Marseille-9 |
| OP646591   | IHUCOVID-002589 | 21-Oct-20       | Marseille-9 |
| OP646592   | IHUCOVID-002725 | 9-Nov-20        | Marseille-4 |
| OP646593   | IHUCOVID-002729 | 12-Nov-20       | Marseille-4 |
| OP646594   | IHUCOVID-002732 | 17-Nov-20       | Marseille-4 |
| OP646595   | IHUCOVID-003235 | 21-Jan-21       | Alpha       |
| OP646596   | IHUCOVID-003219 | 22-Jan-21       | Alpha       |
| OP646597   | IHUCOVID-003239 | 25-Jan-21       | Alpha       |
| OP646598   | IHUCOVID-003247 | 28-Jan-21       | Beta        |
| OP646599   | IHUCOVID-003178 | 2-Feb-21        | Alpha       |
| OP646600   | IHUCOVID-003277 | 3-Feb-21        | Alpha       |
| OP646601   | IHUCOVID-003288 | 10-Feb-21       | Alpha       |
